# Supplementary material for: TWIK-1 BAC-GFP Transgenic Mice, an Animal Model for TWIK-1 Expression
Source: MDPI journal article supplement (doi:10.3390/cells10102751), 2021-10-14
Supplement: s1 [file s1]

## **A** For macroscopic analysis

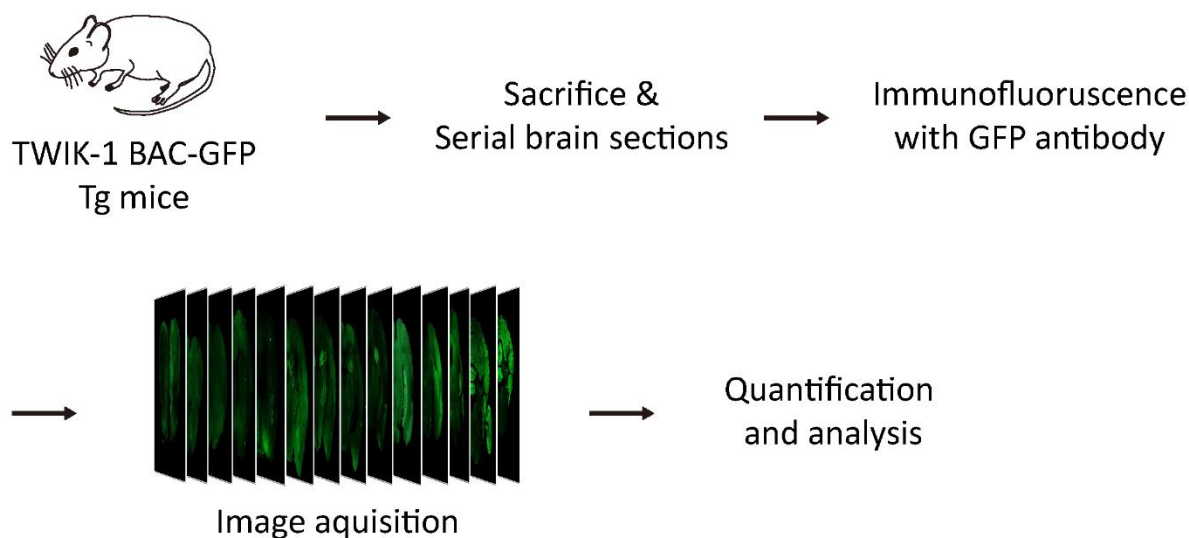

## **B** For microscopic analysis

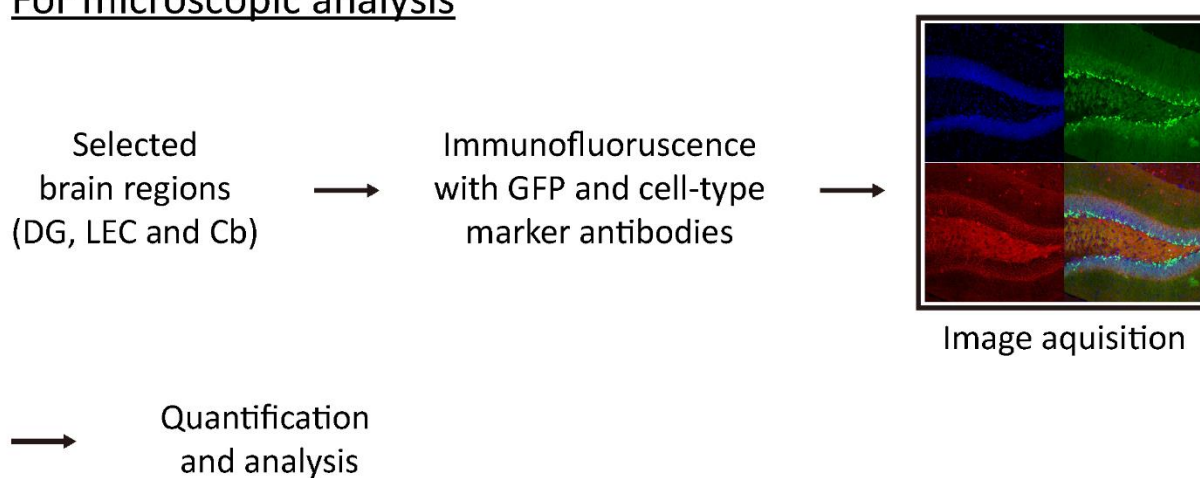

**Supplementary Figure S1.** Pipeline scheme for analysis of GFP expression in TWIK-1 BAC-GFP Tg mice. **(A)** TWIK-1 BAC-GFP Tg mice were sacrificed and sampled via serial coronal brain sections. Next, brain sections were immunostained with anti-GFP antibody and imaged at macroscopic resolution. GFP expressions in various brain regions were quantified and analysed. **(B)** Selected strong GFP-expressing brain regions such as DG, LEC and Cb were immunostained with cell-type specific marker antibodies and imaged at microscopic resolution. Cell-type of GFP-positive cells were analysed and quantified.
