# Supplementary material for: TWIK-1 BAC-GFP Transgenic Mice, an Animal Model for TWIK-1 Expression
Source: Cells. 2021 Oct 14;10(10):2751. doi: 10.3390/cells10102751 (PMC8534699; doi:10.3390/cells10102751)
Supplement: Supplementary file 1 [file cells-10-02751-s001.zip › Supplementary Table S1.xlsx]

## Sheet: Statics
Figure	Region of interst	Cell type / condition	Mean	SEM	p-value	Cohen's effect-size	Mice	Slices	ROIs	Number of counted cells or measured values in the graph
Figure.2C	DG	NeuN+GAD-	96.32	0.9428	-	-	2	2	3	478	463	277
		NeuN+GAD+	0.253	0.04594						1	1	1
		NeuN-	3.453	0.9153						10	15	15
	LEC	NeuN+GAD-	96.7	0.3727	-	-	3	3	4	116	129	132	161
		NeuN+GAD+	0	0						0	0	0	0
		NeuN-	3.36	0.3862						5	4	5	4
	Cb	NeuN+GAD-	94.29	0.8053	-	-	3	3	4	116	129	132	161
		NeuN+GAD+	0	1.713						0	0	0	0
		NeuN-	5.9	0.8565						10	8	6	8
Figure.3C	DG	DCX+	84.68	2.907	-	-	3	4	7	17	19	11	51	30	69	55
		CB+	5.58	2.199						3	0	1	8	0	3	1
		DCX-CB-	9.744	2.457						2	4	3	2	2	3	5
Figure.3D	DG	DCX+	93.58	2.085	-	-	3	3	6	6	17	45	45	38	54
		Ki67+	0	0						0	0	0	0	0	0
		DCX-Ki67-	6.419	2.085						0	1	2	3	7	4
Figure.5C	DG	Saline	1	0.04362	<0.0001	7.88638	4	4	7	0.917659	0.945972	0.912864	0.881112	1.05256	1.10176	1.18807
		Kainic acid	2.19	0.06346			4	4	8	2.3082	2.23782	2.37848	2.23717	2.36507	1.88332	1.98453	2.12228
Figure.5E	DG	Saline	0.008345	0.004238	0.0077	3.26492	2	2	3	0.00806024	0.00425688	0.0127184
		Kainic acid	0.02169	0.003931			2	2	4	0.0261397	0.0174804	0.0236794	0.0194791
Figure.5G	DG	Saline	1	0.06201	0.0063	4.47682	3	3	6	1.05813	0.993641	0.943606	0.732722	1.14926	1.12264
		Kainic acid	1.21	0.02357			4	4	7	1.17415	1.27855	1.20576	1.16172	1.12364	1.23288	1.29377	0.991696
